# Supplementary material for: CCL22 induces pro-inflammatory changes in fibroblast-like synoviocytes
Source: PubMed Central journal article supplement — iScience. 2020 Dec 13;24(1):101943. doi: 10.1016/j.isci.2020.101943 (PMC7809191; doi:10.1016/j.isci.2020.101943), 2020-12-13
Supplement: mmc1.pdf [file mmc1.pdf]

**iScience, Volume 24**

**Supplemental Information**

**CCL22 induces pro-inflammatory changes  
in fibroblast-like synoviocytes**

**Guomin Ren, Nedaa Al-Jezani, Pamela Railton, James N. Powell, and Roman J. Krawetz**

## **Transparent Methods**

### *Human participants*

This study protocol was approved by the University of Calgary Human Research Ethics Board (REB15-0005 and REB15-0880). All individuals involved provided signed consent/assent. The study was carried out in accordance with the declaration of Helsinki. Matching SF and synovial membrane samples were obtained from every individual in the normal and OA cohorts.

Normal Group (n=10): Criteria for control cadaveric donations were an age of 18 years or older, no history of arthritis, joint injury or surgery (including visual inspection of the cartilage surfaces during recovery), no prescription anti-inflammatory medications, no co-morbidities (such as diabetes/cancer), and availability within 4 hours of death.

Knee Osteoarthritis (n=13): Inclusion criteria was based on a diagnosis of OA performed by an orthopedic surgeon at the University of Calgary based on clinical symptoms with radiographic evidence of changes associated with OA in accordance with American College of Rheumatology (ACR) criteria. Radiographic evidence of OA of any compartment of the knee with collapsed or near collapsed joint space of any compartment of the knee (Table 1).

### *FLS derivation*

To obtain FLS for analysis, two biopsies (approximately 5mm in diameter) were obtained from each donor and placed in 1.5mL tubes with 1xDPBS (ThermoFisher) to keep the tissue hydrated. Each synovial membrane biopsy was digested for 1.5 hours at 37<sup>0</sup>C in 1mg/mL filtered type IV collagenase (Sigma) in heat-inactivated FBS (ThermoFisher).

The resultant cell suspension was filtered at 70µm (ThermoFisher) and centrifuged at 5000rpm for 6 minutes. The resultant cell pellet was washed three times with 1ml of 1xDPBS. For *ex vivo* analysis, a sample of the cell suspension was collected at this point and processed for the reported outcome measures. For *in vitro* outcome measures and related analysis, an aliquot of the cell suspension was then expanded in T25 culture flasks (Primaria, Corning/ThermoFisher) in media containing DMEM F12, 10% FBS, 1%

Non-essential Amino Acids, and 1% Anti-anti (all ThermoFisher). Flasks were passaged when cells reached 80% confluence and all outcome measures were performed on FLS before passage 5.

#### *CCL22, S100A12, CCR3, CCR4 and CCR5 analysis by flow cytometry*

FLS were plated at 50,000 cells per well in 6-well plates, allowed to adhere overnight, and treated with the respective condition.

To determine expression of CCL22, S100A12 or CCR3, CCR4 and CCR5 on FLS, the cells were filtered and fixed in 500µl of 90% MeOH for 5-10 minutes at room temperature. The cells were then centrifuged, and washed with DPBS. The cells were centrifuged again, the liquid was removed, and 50µl of blocking buffer and 0.5µg of antibody CD68 (clone # Y1/82A: BD Biosciences); Cadherin-11/CDH-11 (clone # 16G5; BioLegend); CCR4 (clone # L291H4: BioLegend and clone # 1G1: BD Biosciences); CCR3 (clone # 5E8: BD Biosciences); CCR5 (clone # 2D7: BD Biosciences); CCL22 (clone # 57226, R&D systems); S100A12 (clone # 161205, R&D systems); fixable viability stain (FVS) 510 (BV510, BD Biosciences); and/or the appropriate isotype controls/unstained cells were added to each tube and incubated in the dark for 30-45 minutes at room temperature. The cells were washed three times with FACs buffer. The cells were then assayed with the BD LSR II Cytometer. The results were analyzed using FlowJo software. Briefly macrophages (CD68<sup>+</sup>) as well as the dead cells (FVS510<sup>+</sup>) were excluded. FLS (CDH-11<sup>+</sup>) were gated upon and the remainder of the markers were examined in this cell population (**Figure S5**).

#### *Cytokine expression analysis*

FLS were plated (200,000 cells per well) in 12 well Primaria dishes 24 hours before cytokine treatment. Recombinant CCL22 (Peprotech) was added, so that the final concentrations were at 0.2ng/ml or 3ng/ml, which were the mean CCL22 concentrations in SF from normal and OA patients respectively based on our previous study(Ren *et al.*, 2018). FLS were incubated for 24 hours after cytokine treatment and culture media were collected for cytokine profiling analysis.

SF samples were collected without the use of lavage or any other diluting agent. The native SF samples

were aliquoted, centrifuged at 3000g for 15 minutes at 4<sup>0</sup>C and stored in cryogenic vials at -80<sup>0</sup>C. For standardization of the protocol, all SF samples were subjected to only one freeze-thaw event prior to the assessment.

Cytokine profiling analysis was performed by Eve Technologies (Calgary, AB Canada) using the Milliplex MAP Human Cytokine/Chemokine Panel (Millipore) according to the manufacturer's instructions. All samples were assayed in duplicate and prepared standards were included in all runs. The following cytokines were quantified in this study: GM-CSF, IFN $\gamma$ , IL-1B, IL-2, IL-4, IL-5, IL-6, IL-8, IL-10, IL-12(p70), IL-13, MCP-1, TNF $\alpha$ . CCL22 was assayed in single-plex for SF samples. The sensitivities of these makers range from 0.1 – 10.1pg/mL (average 2.359pg/ml) and the inter-array accuracies ranged from 3.5% – 18.9% coefficient of variation (average 10.7%).

#### *RT-qPCR array analysis*

RNA was extracted using Trizol Reagent (ThermoFisher). Total RNA was purified with RNeasy Plus Micro Kit (Qiagen) to remove genomic DNA. The RNA integrity number (RIN) was measured with Agilent RNA 6000 NanoChips on a 2100 Bioanalyzer (Agilent Technologies). The quantity was measured with a NanoDrop 1,000 (NanoDrop Technologies). Total mRNA from each well was extracted and purified using Trizol (ThermoFisher) and converted into cDNA according to the High Capacity cDNA Reverse Transcription Kits protocol (Applied Biosystems). cDNA along with SYBR<sup>TM</sup> Green PCR Master Mix (Applied Biosystems) was added to the Chemotaxis Tier 1-4 H384 predesigned qPCR array plate (Bio-Rad) and run on a QuantStudio 6 system (Applied Biosystems).

#### *Relative quantification of gene expression*

Total mRNA from each well was extracted and purified using Trizol (ThermoFisher) and converted into cDNA according to the High Capacity cDNA Reverse Transcription Kits protocol (Applied Biosystems). Two microliters of cDNA was added to a 96 well qPCR plate along with CCL22, S100A12, CCR3 and CCR5 TaqMan<sup>®</sup> validated probes and TaqMan<sup>®</sup> Universal PCR Master Mix. In addition, an 18S RNA

probe was used as an endogenous control. All samples were assayed in triplicate.

### *Histology, immunofluorescence (IF) and in situ hybridization*

Both normal and OA synovium was fixed with formalin and embedded in paraffin. Sections were stained with hematoxylin and eosin to identify synovitis (Krenn *et al.*, 2006). Three features of synovitis (enlargement of lining layer, cellular density of stroma, inflammatory infiltrate) were evaluated separately on a scale of from 0 to 3 (absent to strong) and then summed. The total score was interpreted as follows: no synovitis (0-1.9); low-grade synovitis (2–4.9); high grade synovitis (5-9).

Sections were also deparaffinized in CitraSolv (Fisher Scientific) and rehydrated through a series of graded ethanol to distilled water steps. Antigen retrieval (10mM sodium citrate, pH 6.0) and blocking (1:500 dilution; 100 $\mu$ L goat serum): 50mL TRIS-buffered saline, 0.1% Tween 20 (TBST) for 1hr), steps were performed prior to going through sequential wash (TBST) and primary antibody application steps. Primary antibodies (same as listed in the flow cytometry section) were directly conjugated to fluorescent probes (Abcam, Dylight system) and the nucleic acid stain DAPI (Sigma) were applied to sections. After antibody staining, sections were mounted using FluorSave reagent (Calbiochem) and coverslipped. A Zeiss Axio Scan.Z1 microscope was used to detect the signal localization and Zen software was used to quantify the signal intensity for each antibody. Fluorescent signal for each specific marker was quantified within the synovium (O'Brien *et al.*, 2017; Jablonski *et al.*, 2019). Briefly, n=3 tissue sections per biopsy (100mm<sup>2</sup> fields of view) were assayed for each fluorescent filter (e.g. 488, 568). The mean fluorescent intensity (MFI) in these areas of interest was obtained from the Zen software.

For *in situ* hybridization, the dewaxed and rehydrated sections were boiled in sodium citrate for 10 min. The sections underwent protease digestion (0.2% pepsin/0.01 M HCl) at 37 °C for 10 min, and stringency washes in 0.1% NP-40/SSC buffer (150mM sodium chloride, 15mM sodium citrate, pH 7.0) at 37 °C for 30 min. The mixture of fluorescently labelled probes (IDT) was added to the sections in 50% formamide/SSC, heated to 85 °C (5 min) and incubated at 37 °C (overnight). The slides were washed with 50% formamide/2 $\times$  SSC and then with 0.1% NP-40/SSC buffer at 45 °C, before they were counterstained

with DAPI. The slides were covered, imaged and MFI obtained as described above.

#### *Western blot / dot blot analysis*

Total protein was collected from FLS using a Tris-HCl/SDS based lysis/sample buffer and separated on a 10% poly-acrylamide gel. The gels were transferred to nitrocellulose membranes and probed with primary antibodies specific to the proteins CCL22 (clone # 57226, R&D systems) and Histone H3 (Cell Signaling). Histone H3 was utilized as a control, since it is constitutively expressed in most cell types. An appropriate infra-red secondary was utilized for detection of the signal with the Odyssey imaging system (LICOR). In the case of dot blot analysis, cell lysates were spotted directly onto nitrocellulose using a vacuum manifold in place of gel electrophoresis.

#### *Transfection and shRNA knockdown*

For gene knockdown of CCR3 and CCR5, we employed the MISSION® shRNA Plasmid system (Sigma). Plasmid DNAs including a non-sense shRNA control, were purified from bacterial cultures using the PureLink® HiPure Plasmid Midiprep Kit (Life Technologies). Cells were transfected using the TransIT-2020 (Mirus Bio LLC). After 24 h incubation at 37°C, puromycin (Sigma) was added to the culture media to select for transfected cells for an additional 48h before processing for subsequent analysis.

#### *Calcium flux assay*

A modified method was employed based on a previous study (Nibbs *et al.*, 2000). FLS were washed in assay buffer (136mM NaCl, 4.8mM KCl, 5mM glucose, 1mM CaCl<sub>2</sub>, 0.025% BSA, and 25mM HEPES), and then incubated with 10mM fura-2-AM (Sigma) for 1 h at 37°C. FLS were washed in assay buffer and incubated at 37°C in Victor X3 (Perkin-Elmer) plate reader. Fluorescence emission was recorded every 1s for 10s, after which a specific chemokine ligand (or negative control – PBS) was added and fluorescence emission was recorded (500 nm) every 1s for an additional 40s. For all experiments, the highest point of the flux was calculated and all values were presented as a percentage of the maximal flux.

### *Data analysis*

Graphpad was used for the statistical analysis. ANOVA with multiple comparison correction was used to compare cytokine profiling, gene expression or protein expression between treatments and controls. Linear regression was used to determine the  $R^2$  value and significance for CCL22/S100A12 staining vs. CCL22 SF levels.

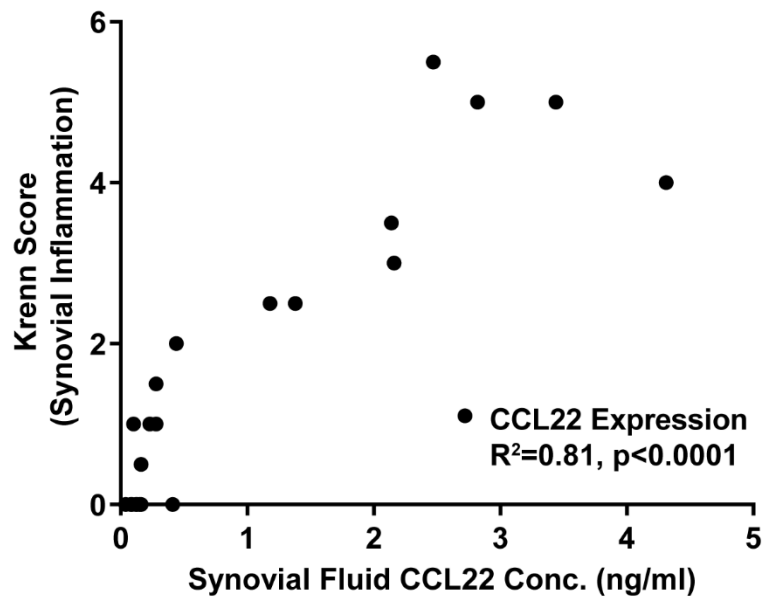

**Figure S1. Relationship between Synovitis and SF CCL22 concentration, Related to Table 1.** A positive and significant relationship was observed between synovitis score (Krenn) and SF concentration of CCL22. ( $R^2=0.81$   $p<0.0001$ ).



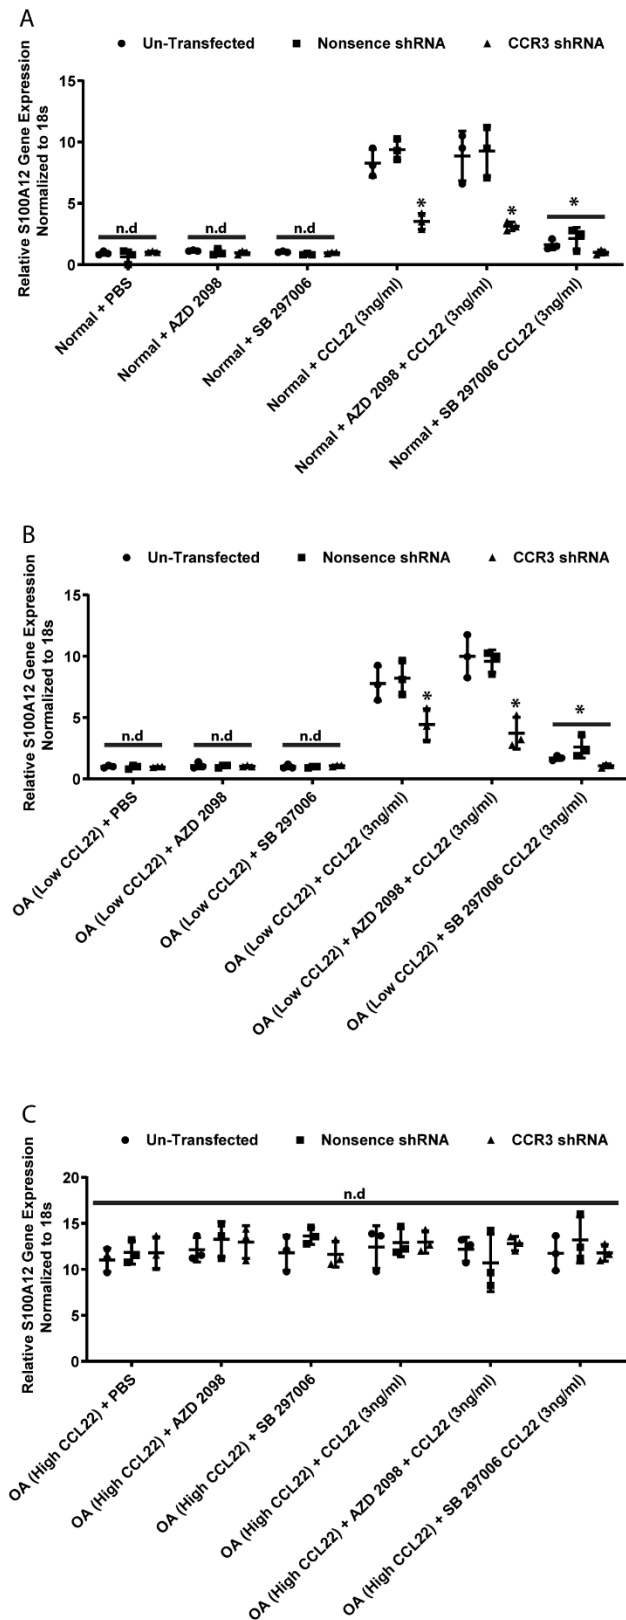

**Figure S2. Inhibition of CCR4 has no effect on CCL22 induced *S100A12* expression, Related to Figure 7.** FLS (normal n=3; OA low CCL22 n=3; OA high CCL22 n=3) transfected with a nonsense control shRNA or CCR3 shRNA were exposed to AZD 2098 (CCR4 inhibitor) or SB 297006 (CCR3 inhibitor) with/without CCL22 treatment. AZD 2098 has no effect on CCL22 induced *S100A12* expression, while SB 297006 inhibited *S100A12* expression in normal and OA low CCL22 FLS, but not in OA high CCL22 FLS. \*p<0.05. n.d. = no difference. Data are represented as mean  $\pm$  SD.

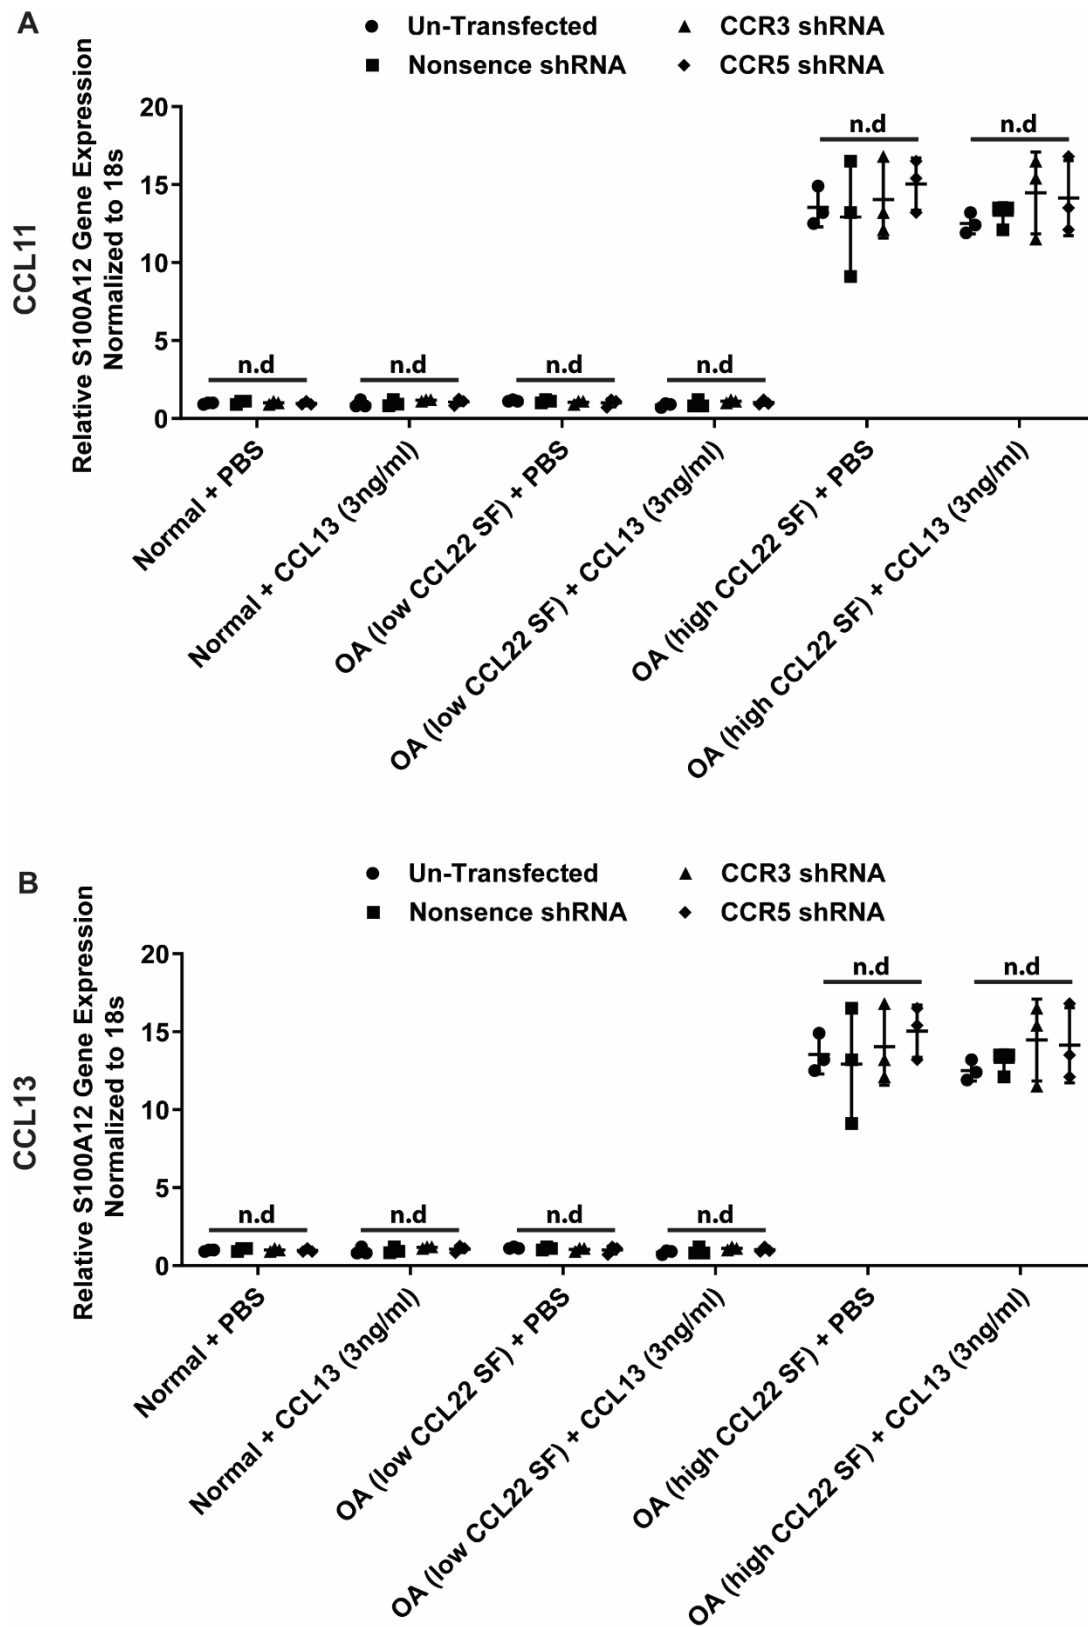

**Figure S3. CCL11 and CCL13 do not induce expression of S100A12, Related to Figure 7.** Control and transfected FLS (normal n=3; OA low CCL22 n=3; OA high CCL22 n=3) treated with CCL11 and CCL13 were assayed for S100A12 at the mRNA level with RT-qPCR. Neither CCL11 (A) nor CCL13 (B) induced S100A12 mRNA expression. n.d. = no difference. Data are represented as mean  $\pm$  SD.

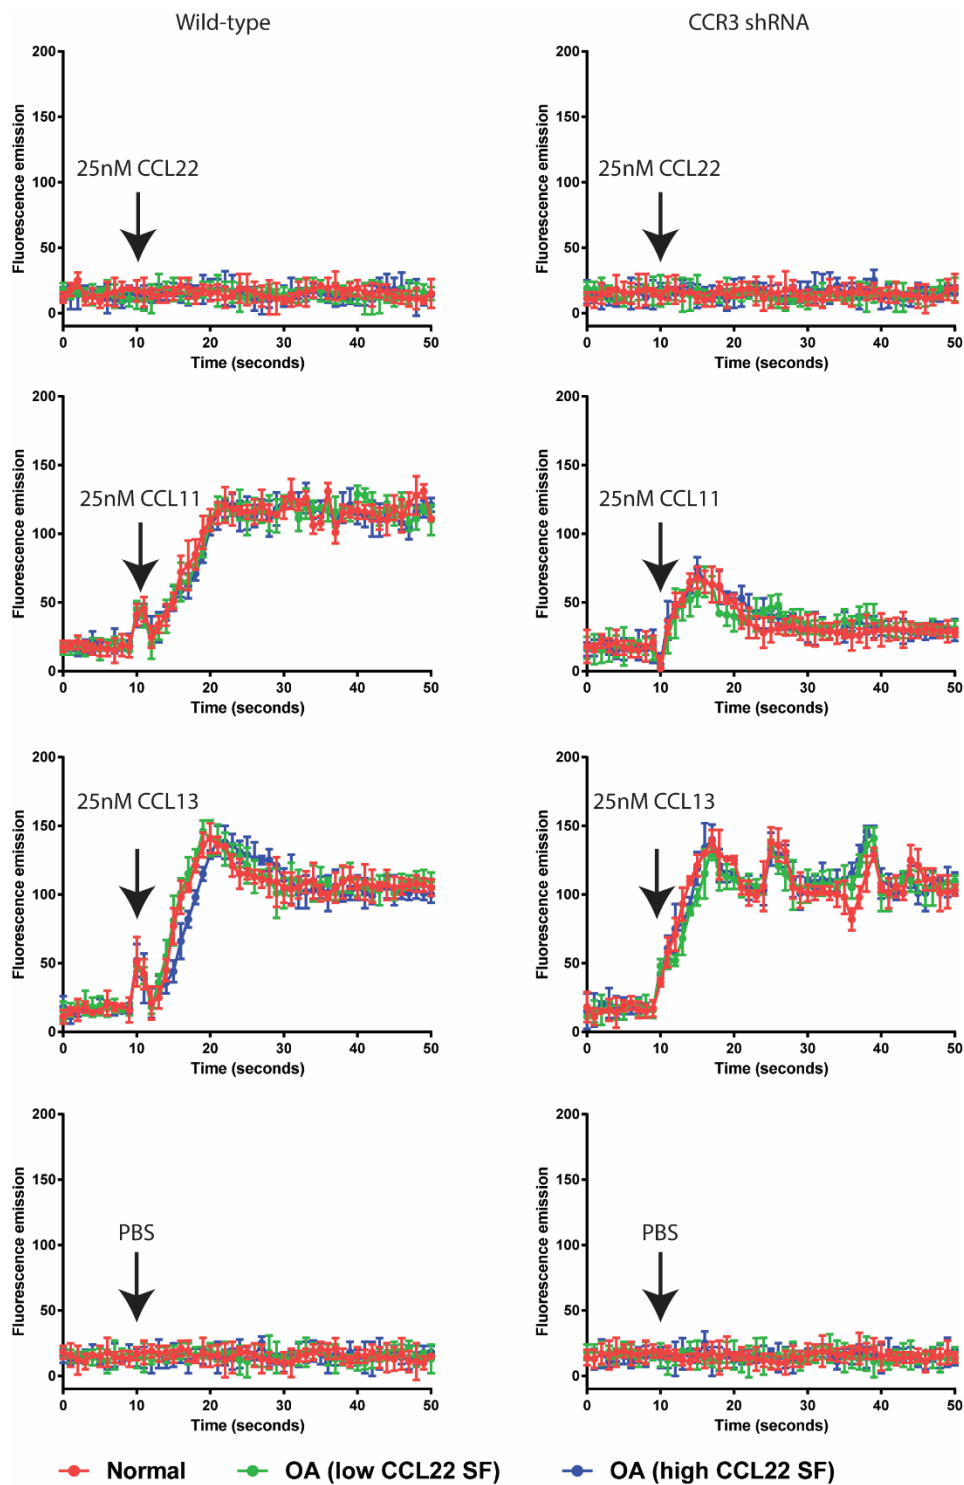

● Normal   
 ● OA (low CCL22 SF)   
 ● OA (high CCL22 SF)

**Figure S4. CCL11 and CCL13 induce calcium flux in FLS while CCL22 does not, Related to Figure 7.** Control and transfected (CCR3 shRNA) FLS (normal n=3; OA low CCL22 n=3; OA high CCL22 n=3) treated with CCL11, CCL13 and CCL22 were assayed for calcium flux. CCL22 was not able to induce a calcium flux in control or CCR3 shRNA FLS (normal or OA); while CCL11 and CCL13 were both able to induce a calcium flux. CCR3 shRNA transfected FLS demonstrated a reduced calcium flux in the presence of CCL11.

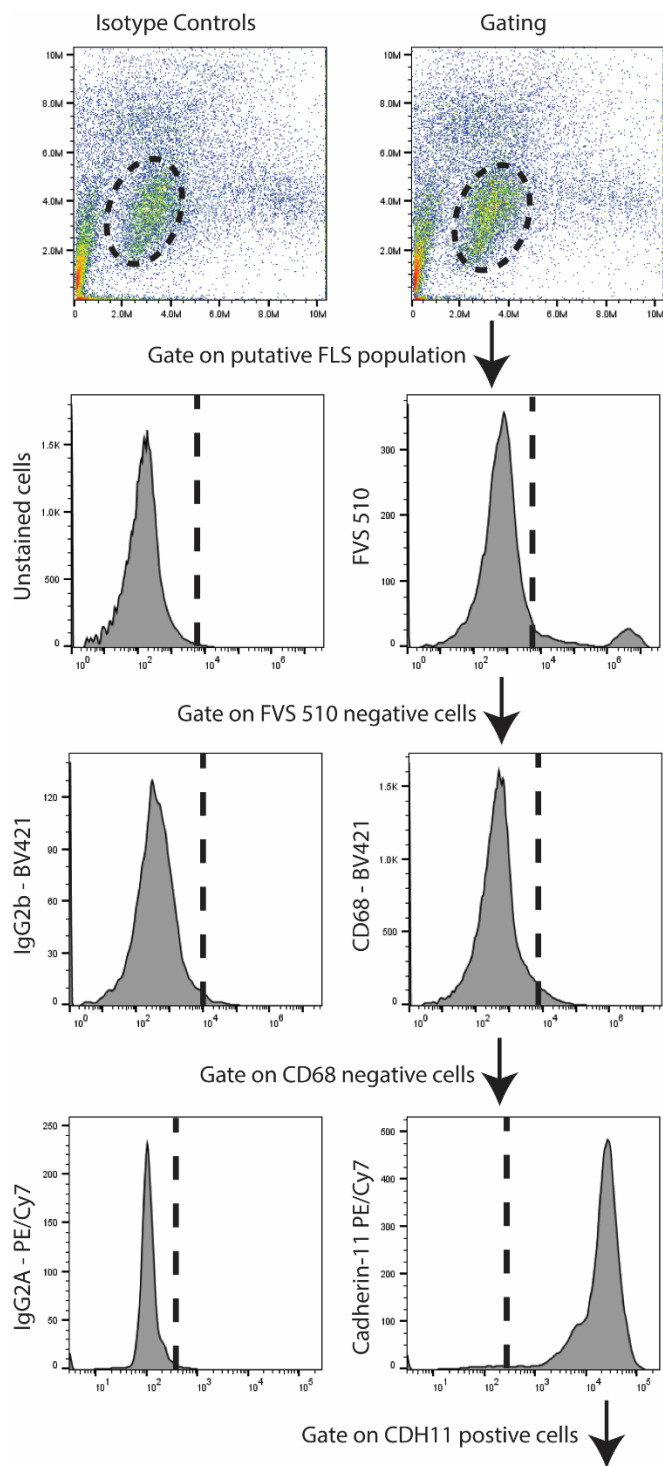

Analysis of additional markers in FLS (CCR3, CCR4, CCR5, CCL22)

**Figure S5. Flow cytometry gating strategy, Related to Figure 3, Figure 6 and Figure 7.** Isotype controls and unstained cells were employed to determine background staining levels. The putative FLS population was identified based on forward and side scatter. Dead cells were excluded based on FVS 510 (viability dye) staining. Macrophage populations were excluded based on CD68 expression and the remaining population was gated on CDH-11 positive FLS.

**Table S1. Complete list of gene expression differences between normal FLS with/without exposure to 3ng/ml CCL22 for 24hrs. Related to Figure 2.**

| Relative Fold Expression Difference | Gene Symbol | Gene Name                                                               | Notes                |
|-------------------------------------|-------------|-------------------------------------------------------------------------|----------------------|
| 1.16                                | ACTA1       | actin, alpha 1, skeletal muscle                                         |                      |
| 0.91                                | ACTA2       | actin, alpha 2, smooth muscle, aorta                                    |                      |
| 1.06                                | ACTB        | actin, beta                                                             | Housekeeping gene    |
| 0.99                                | ACTG1       | actin, gamma 1                                                          |                      |
| 1.10                                | ALCAM       | activated leukocyte cell adhesion molecule                              |                      |
| 1.07                                | ATF2        | activating transcription factor 2                                       |                      |
| 0.81                                | ADRB2       | adrenergic, beta-2-, receptor, surface                                  |                      |
| 0.91                                | AIMP1       | aminoacyl tRNA synthetase complex-interacting multifunctional protein 1 |                      |
| 0.92                                | APP         | amyloid beta (A4) precursor protein                                     |                      |
| 1.06                                | ANGPT1      | angiopoietin 1                                                          |                      |
| 0.93                                | AGTR1       | angiotensin II receptor, type 1                                         |                      |
| Not Detected                        | AGTR2       | angiotensin II receptor, type 2                                         |                      |
| 0.94                                | ARRB2       | arrestin, beta 2                                                        |                      |
| 1.05                                | AZU1        | azurocidin 1                                                            |                      |
| 1.08                                | BMP4        | bone morphogenetic protein 4                                            |                      |
| 1.15                                | BMP7        | bone morphogenetic protein 7                                            |                      |
| 1.01                                | BMPR1B      | bone morphogenetic protein receptor, type IB                            |                      |
| 0.90                                | BDKRB1      | bradykinin receptor B1                                                  |                      |
| 0.95                                | BDKRB2      | bradykinin receptor B2                                                  |                      |
| 1.07                                | BDNF        | brain-derived neurotrophic factor                                       |                      |
| 0.97                                | BCR         | breakpoint cluster region                                               |                      |
| 0.96                                | BCAR1       | breast cancer anti-estrogen resistance 1                                |                      |
| 0.95                                | ABL1        | c-abl oncogene 1, non-receptor tyrosine kinase                          |                      |
| 0.91                                | CALCA       | calcitonin-related polypeptide alpha                                    |                      |
| 0.94                                | CREB1       | cAMP responsive element binding protein 1                               |                      |
| 1.16                                | CREB3       | cAMP responsive element binding protein 3                               |                      |
| 0.88                                | CSNK2A1     | casein kinase 2, alpha 1 polypeptide                                    |                      |
| 0.90                                | CTNNB1      | catenin (cadherin-associated protein), beta 1                           |                      |
| 1.13                                | CD14        | CD14 molecule                                                           |                      |
| 0.99                                | CD34        | CD34 molecule                                                           |                      |
| 0.96                                | CD4         | CD4 molecule                                                            |                      |
| 0.94                                | CD44        | CD44 molecule                                                           |                      |
| 0.95                                | CD8A        | CD8a molecule                                                           |                      |
| 1.16                                | CDC42       | cell division cycle 42                                                  |                      |
| 1.04                                | XCL1        | chemokine (C motif) ligand 1                                            |                      |
| 0.93                                | CCL1        | chemokine (C-C motif) ligand 1                                          |                      |
| 0.90                                | CCL11       | chemokine (C-C motif) ligand 11                                         |                      |
| 0.93                                | CCL13       | chemokine (C-C motif) ligand 13                                         |                      |
| 0.93                                | CCL16       | chemokine (C-C motif) ligand 16                                         |                      |
| 2.75                                | CCL17       | chemokine (C-C motif) ligand 17                                         | Reached significance |
| 0.89                                | CCL18       | chemokine (C-C motif) ligand 18                                         |                      |
| 1.07                                | CCL19       | chemokine (C-C motif) ligand 19                                         |                      |
| 0.92                                | CCL2        | chemokine (C-C motif) ligand 2                                          |                      |
| 1.12                                | CCL20       | chemokine (C-C motif) ligand 20                                         |                      |
| 0.93                                | CCL21       | chemokine (C-C motif) ligand 21                                         |                      |
| 6.28                                | CCL22       | chemokine (C-C motif) ligand 22                                         | Reached significance |
| Not Detected                        | CCL23       | chemokine (C-C motif) ligand 23                                         |                      |
| 0.94                                | CCL24       | chemokine (C-C motif) ligand 24                                         |                      |
| 1.03                                | CCL25       | chemokine (C-C motif) ligand 25                                         |                      |
| 0.95                                | CCL26       | chemokine (C-C motif) ligand 26                                         |                      |
| 1.09                                | CCL27       | chemokine (C-C motif) ligand 27                                         |                      |
| 1.18                                | CCL28       | chemokine (C-C motif) ligand 28                                         |                      |
| 0.91                                | CCL3        | chemokine (C-C motif) ligand 3                                          |                      |
| 1.06                                | CCL4        | chemokine (C-C motif) ligand 4                                          |                      |
| Not Detected                        | CCL4L1      | chemokine (C-C motif) ligand 4-like 1                                   |                      |
| 1.03                                | CCL5        | chemokine (C-C motif) ligand 5                                          |                      |
| 0.93                                | CCL7        | chemokine (C-C motif) ligand 7                                          |                      |
| Not Detected                        | CCL8        | chemokine (C-C motif) ligand 8                                          |                      |
| 0.97                                | CCR1        | chemokine (C-C motif) receptor 1                                        |                      |
| 1.04                                | CCR10       | chemokine (C-C motif) receptor 10                                       |                      |
| 1.15                                | CCR2        | chemokine (C-C motif) receptor 2                                        |                      |
| 1.14                                | CCR3        | chemokine (C-C motif) receptor 3                                        |                      |
| Not Detected                        | CCR4        | chemokine (C-C motif) receptor 4                                        |                      |
| 0.85                                | CCR5        | chemokine (C-C motif) receptor 5                                        |                      |
| 1.09                                | CCR6        | chemokine (C-C motif) receptor 6                                        |                      |
| 1.03                                | CCR7        | chemokine (C-C motif) receptor 7                                        |                      |
| 1.06                                | CCR8        | chemokine (C-C motif) receptor 8                                        |                      |
| 1.09                                | CCR9        | chemokine (C-C motif) receptor 9                                        |                      |
| Not Detected                        | CCRL2       | chemokine (C-C motif) receptor-like 2                                   |                      |
| 0.94                                | CX3CL1      | chemokine (C-X3-C motif) ligand 1                                       |                      |
| 0.98                                | CX3CR1      | chemokine (C-X3-C motif) receptor 1                                     |                      |
| 0.93                                | CXCL1       | chemokine (C-X-C motif) ligand 1                                        |                      |
| Not Detected                        | CXCL10      | chemokine (C-X-C motif) ligand 10                                       |                      |
| Not Detected                        | CXCL11      | chemokine (C-X-C motif) ligand 11                                       |                      |
| 1.14                                | CXCL12      | chemokine (C-X-C motif) ligand 12                                       |                      |
| Not Detected                        | CXCL13      | chemokine (C-X-C motif) ligand 13                                       |                      |
| 0.97                                | CXCL14      | chemokine (C-X-C motif) ligand 14                                       |                      |
| 0.99                                | CXCL16      | chemokine (C-X-C motif) ligand 16                                       |                      |
| 0.95                                | CXCL17      | chemokine (C-X-C motif) ligand 17                                       |                      |
| 0.93                                | CXCL2       | chemokine (C-X-C motif) ligand 2                                        |                      |
| 1.06                                | CXCL3       | chemokine (C-X-C motif) ligand 3                                        |                      |

| Relative Fold Expression Difference | Gene Symbol   | Gene Name                                                            | Notes |
|-------------------------------------|---------------|----------------------------------------------------------------------|-------|
| 1.01                                | CXCL5         | chemokine (C-X-C motif) ligand 5                                     |       |
| 1.11                                | CXCL6         | chemokine (C-X-C motif) ligand 6                                     |       |
| 0.95                                | CXCL9         | chemokine (C-X-C motif) ligand 9                                     |       |
| Not Detected                        | CXCR1         | chemokine (C-X-C motif) receptor 1                                   |       |
| Not Detected                        | CXCR2         | chemokine (C-X-C motif) receptor 2                                   |       |
| 1.06                                | CXCR3         | chemokine (C-X-C motif) receptor 3                                   |       |
| 0.94                                | CXCR4         | chemokine (C-X-C motif) receptor 4                                   |       |
| 1.01                                | CXCR5         | chemokine (C-X-C motif) receptor 5                                   |       |
| 1.01                                | CXCR6         | chemokine (C-X-C motif) receptor 6                                   |       |
| Not Detected                        | CCBP2         | chemokine binding protein 2                                          |       |
| Not Detected                        | CMKLR1        | chemokine-like receptor 1                                            |       |
| 1.08                                | CCKBR         | cholecystokinin B receptor                                           |       |
| Not Detected                        | CHRM3         | cholinergic receptor, muscarinic 3                                   |       |
| 0.91                                | CLTC          | clathrin, heavy chain (Hc)                                           |       |
| 1.03                                | F2            | coagulation factor II                                                |       |
| 0.93                                | F2R           | coagulation factor II receptor                                       |       |
| 1.01                                | F2RL1         | coagulation factor II receptor-like 1                                |       |
| 1.04                                | CFL1          | cofilin 1                                                            |       |
| 0.86                                | COL1A2        | collagen, type I, alpha 2                                            |       |
| 1.06                                | COL4A1        | collagen, type IV, alpha 1                                           |       |
| 1.06                                | COL4A2        | collagen, type IV, alpha 2                                           |       |
| 1.05                                | COL4A3        | collagen, type IV, alpha 3                                           |       |
| 0.93                                | COL4A4        | collagen, type IV, alpha 4                                           |       |
| 1.11                                | CSF2          | colony stimulating factor 2                                          |       |
| 0.96                                | CSF3          | colony stimulating factor 3                                          |       |
| 1.03                                | CSF3R         | colony stimulating factor 3 receptor                                 |       |
| 1.08                                | C3            | complement component 3                                               |       |
| 0.96                                | C3AR1         | complement component 3a receptor 1                                   |       |
| 1.02                                | C5            | complement component 5                                               |       |
| 0.93                                | C5AR1         | complement component 5a receptor 1                                   |       |
| 1.09                                | CXADR         | coxsackie virus and adenovirus receptor                              |       |
| 0.90                                | CDK5          | cyclin-dependent kinase 5                                            |       |
| 0.98                                | CYR61         | cysteine-rich, angiogenic inducer, 61                                |       |
| 1.03                                | CYSLTR1       | cysteinyl leukotriene receptor 1                                     |       |
| Not Detected                        | CYSLTR2       | cysteinyl leukotriene receptor 2                                     |       |
| 1.09                                | DOCK1         | dedicator of cytokinesis 1                                           |       |
| 1.06                                | DOCK2         | dedicator of cytokinesis 2                                           |       |
| 0.99                                | DEFA1         | defensin, alpha 1                                                    |       |
| Not Detected                        | DEFA3         | defensin, alpha 3                                                    |       |
| 0.97                                | DEFB1         | defensin, beta 1                                                     |       |
| 1.14                                | DEFB4A        | defensin, beta 4A                                                    |       |
| 0.88                                | DPYSL2        | dihydropyrimidinase-like 2                                           |       |
| 0.91                                | ENPP2         | ectonucleotide pyrophosphatase/phosphodiesterase 2                   |       |
| Not Detected                        | EMR2          | egf-like module containing, mucin-like, hormone receptor-like 2      |       |
| 0.97                                | ENG           | endoglin                                                             |       |
| Not Detected                        | ECSCR         | endothelial cell-specific chemotaxis regulator                       |       |
| 0.93                                | EDN1          | endothelin 1                                                         |       |
| 1.10                                | EDNRA         | endothelin receptor type A                                           |       |
| 1.06                                | EDNRB         | endothelin receptor type B                                           |       |
| 0.84                                | EPHA1         | EPH receptor A1                                                      |       |
| 0.97                                | EPHA2         | EPH receptor A2                                                      |       |
| 1.06                                | EPHA3         | EPH receptor A3                                                      |       |
| 0.77                                | EPHA4         | EPH receptor A4                                                      |       |
| 1.04                                | EPHB1         | EPH receptor B1                                                      |       |
| 1.06                                | EPHB2         | EPH receptor B2                                                      |       |
| 1.01                                | EPHB3         | EPH receptor B3                                                      |       |
| 0.91                                | EPHB4         | EPH receptor B4                                                      |       |
| 0.95                                | EPHB6         | EPH receptor B6                                                      |       |
| 0.92                                | EFNA1         | ephrin-A1                                                            |       |
| 1.01                                | EFNA3         | ephrin-A3                                                            |       |
| Not Detected                        | RP11-540D14.8 | Ephrin-A3; cDNA FLJ57652, highly similar to Ephrin-A3                |       |
| 1.06                                | EFNA5         | ephrin-A5                                                            |       |
| 1.04                                | EFNB1         | ephrin-B1                                                            |       |
| 0.87                                | EFNB2         | ephrin-B2                                                            |       |
| Not Detected                        | EGF           | epidermal growth factor                                              |       |
| 0.96                                | EGFR          | epidermal growth factor receptor                                     |       |
| 1.21                                | EZR           | ezrin                                                                |       |
| 1.06                                | FCER1A        | Fc fragment of IgE, high affinity I, receptor for; alpha polypeptide |       |
| 1.10                                | FCGR2A        | Fc fragment of IgG, low affinity IIa, receptor                       |       |
| 0.97                                | FES           | feline sarcoma oncogene                                              |       |
| 0.95                                | FGF2          | fibroblast growth factor 2                                           |       |
| 0.93                                | FGF7          | fibroblast growth factor 7                                           |       |
| 0.93                                | FGFR1         | fibroblast growth factor receptor 1                                  |       |
| Not Detected                        | FLT1          | fms-related tyrosine kinase 1                                        |       |
| 1.04                                | FPR1          | formyl peptide receptor 1                                            |       |
| 1.08                                | FPR2          | formyl peptide receptor 2                                            |       |
| 0.90                                | FPR3          | formyl peptide receptor 3                                            |       |
| 0.91                                | FOSL1         | FOS-like antigen 1                                                   |       |
| 0.95                                | FZD4          | frizzled homolog 4                                                   |       |
| 0.89                                | FYN           | FYN oncogene related to SRC, FGR, YES                                |       |
| Not Detected                        | GPR44         | G protein-coupled receptor 44                                        |       |

| Relative Fold Expression Difference | Gene Symbol  | Gene Name                                                    | Notes                       |
|-------------------------------------|--------------|--------------------------------------------------------------|-----------------------------|
| 0.92                                | GATA3        | GATA binding protein 3                                       |                             |
| 0.90                                | GDNF         | glial cell derived neurotrophic factor                       |                             |
| <b>1.10</b>                         | <b>GAPDH</b> | <b>glyceraldehyde-3-phosphate dehydrogenase</b>              | <b>Housekeeping gene</b>    |
| 1.09                                | GSK3A        | glycogen synthase kinase 3 alpha                             |                             |
| 0.85                                | GSK3B        | glycogen synthase kinase 3 beta                              |                             |
| 1.03                                | GAS6         | growth arrest-specific 6                                     |                             |
| <b>3.68</b>                         | <b>GRB2</b>  | <b>growth factor receptor-bound protein 2</b>                | <b>Reached significance</b> |
| 0.97                                | HSPB1        | heat shock 27kDa protein 1                                   |                             |
| 0.82                                | HSP90AA1     | heat shock protein 90kDa alpha (cytosolic), class A member 1 |                             |
| 0.97                                | HSP90AB1     | heat shock protein 90kDa alpha (cytosolic), class B member 1 |                             |
| 0.88                                | HSP90B1      | heat shock protein 90kDa beta (Grp94), member 1              |                             |
| 0.86                                | HGF          | hepatocyte growth factor                                     |                             |
| 0.95                                | HMGB1        | high mobility group box 1                                    |                             |
| 1.06                                | HRH1         | histamine receptor H1                                        |                             |
| 0.97                                | HPRT1        | hypoxanthine phosphoribosyltransferase 1                     |                             |
| 1.19                                | IGF1         | insulin-like growth factor 1                                 |                             |
| 1.06                                | ITGA1        | integrin, alpha 1                                            |                             |
| 1.03                                | ITGA2        | integrin, alpha 2                                            |                             |
| 1.13                                | ITGA2B       | integrin, alpha 2b                                           |                             |
| 1.32                                | ITGA3        | integrin, alpha 3                                            |                             |
| 1.04                                | ITGA4        | integrin, alpha 4                                            |                             |
| 0.95                                | ITGA5        | integrin, alpha 5                                            |                             |
| 0.90                                | ITGA6        | integrin, alpha 6                                            |                             |
| 1.07                                | ITGA7        | integrin, alpha 7                                            |                             |
| 1.04                                | ITGA9        | integrin, alpha 9                                            |                             |
| 0.94                                | ITGAL        | integrin, alpha L                                            |                             |
| 0.94                                | ITGAM        | integrin, alpha M                                            |                             |
| 0.91                                | ITGAV        | integrin, alpha V                                            |                             |
| 1.09                                | ITGAX        | integrin, alpha X                                            |                             |
| 0.90                                | ITGB1        | integrin, beta 1                                             |                             |
| 0.95                                | ITGB2        | integrin, beta 2                                             |                             |
| 0.99                                | ITGB5        | integrin, beta 5                                             |                             |
| 0.95                                | ITGB6        | integrin, beta 6                                             |                             |
| 0.92                                | ITGB8        | integrin, beta 8                                             |                             |
| 0.93                                | ICAM1        | intercellular adhesion molecule 1                            |                             |
| 0.97                                | IFNG         | interferon, gamma                                            |                             |
| 1.04                                | IL1A         | interleukin 1, alpha                                         |                             |
| Not Detected                        | IL1B         | interleukin 1, beta                                          |                             |
| <b>0.47</b>                         | <b>IL10</b>  | <b>interleukin 10</b>                                        | <b>Reached significance</b> |
| 0.88                                | IL13         | interleukin 13                                               |                             |
| 0.82                                | IL16         | interleukin 16                                               |                             |
| 1.01                                | IL17A        | interleukin 17A                                              |                             |
| 0.95                                | IL17B        | interleukin 17B                                              |                             |
| Not Detected                        | IL18         | interleukin 18                                               |                             |
| Not Detected                        | IL2          | interleukin 2                                                |                             |
| <b>0.62</b>                         | <b>IL4</b>   | <b>interleukin 4</b>                                         | <b>Reached significance</b> |
| Not Detected                        | IL5          | interleukin 5                                                |                             |
| 0.88                                | IL6          | interleukin 6                                                |                             |
| 0.98                                | IL6R         | interleukin 6 receptor                                       |                             |
| 0.96                                | IL6ST        | interleukin 6 signal transducer                              |                             |
| 1.06                                | IL8          | interleukin 8                                                |                             |
| 0.96                                | JUND         | jun D proto-oncogene                                         |                             |
| 1.13                                | JUN          | jun proto-oncogene                                           |                             |
| 1.08                                | KDR          | kinase insert domain receptor                                |                             |
| 0.97                                | KISS1R       | KISS1 receptor                                               |                             |
| 0.86                                | L1CAM        | L1 cell adhesion molecule                                    |                             |
| 1.16                                | LAMA3        | laminin, alpha 3                                             |                             |
| 1.06                                | LAMA5        | laminin, alpha 5                                             |                             |
| 1.14                                | LTB4R2       | leukotriene B4 receptor 2                                    |                             |
| 1.08                                | LIMK1        | LIM domain kinase 1                                          |                             |
| 1.09                                | LBP          | lipopolysaccharide binding protein                           |                             |
| 1.01                                | LSP1         | lymphocyte-specific protein 1                                |                             |
| 0.88                                | LEF1         | lymphoid enhancer-binding factor 1                           |                             |
| 0.99                                | MIF          | macrophage migration inhibitory factor                       |                             |
| 1.12                                | MTOR         | mechanistic target of rapamycin                              |                             |
| 0.76                                | MET          | met proto-oncogene                                           |                             |
| 1.05                                | MAPK1        | mitogen-activated protein kinase 1                           |                             |
| 1.08                                | MAPK11       | mitogen-activated protein kinase 11                          |                             |
| 0.90                                | MAPK14       | mitogen-activated protein kinase 14                          |                             |
| 0.94                                | MAPK3        | mitogen-activated protein kinase 3                           |                             |
| 0.97                                | MAPK8        | mitogen-activated protein kinase 8                           |                             |
| 0.84                                | MAP2K1       | mitogen-activated protein kinase kinase 1                    |                             |
| 0.95                                | MAP2K2       | mitogen-activated protein kinase kinase 2                    |                             |
| 1.24                                | MSN          | moesin                                                       |                             |
| 0.94                                | MPO          | myeloperoxidase                                              |                             |
| 0.97                                | MYH9         | myosin, heavy chain 9                                        |                             |
| 0.93                                | NCK1         | NCK adaptor protein 1                                        |                             |
| 1.06                                | NCK2         | NCK adaptor protein 2                                        |                             |
| 1.07                                | NGFR         | nerve growth factor receptor                                 |                             |
| 0.93                                | NTN1         | netrin 1                                                     |                             |
| 1.07                                | NTN4         | netrin 4                                                     |                             |

| Relative Fold Expression Difference | Gene Symbol    | Gene Name                                                            | Notes                       |
|-------------------------------------|----------------|----------------------------------------------------------------------|-----------------------------|
| 1.06                                | NCAM1          | neural cell adhesion molecule 1                                      |                             |
| Not Detected                        | NRAS           | neuroblastoma RAS viral (v-ras) oncogene homolog                     |                             |
| 0.91                                | NRP1           | neuropilin 1                                                         |                             |
| 1.18                                | NRP2           | neuropilin 2                                                         |                             |
| 0.84                                | NTRK1          | neurotrophic tyrosine kinase, receptor, type 1                       |                             |
| 0.92                                | NKX2-1         | NK2 homeobox 1                                                       |                             |
| 1.06                                | NFKB1          | nuclear factor of kappa light polypeptide gene enhancer in B-cells 1 |                             |
| 0.92                                | NR4A1          | nuclear receptor subfamily 4, group A, member 1                      |                             |
| 1.06                                | NR4A3          | nuclear receptor subfamily 4, group A, member 3                      |                             |
| 1.09                                | PAK1           | p21 protein (Cdc42/Rac)-activated kinase 1                           |                             |
| 1.08                                | PAK2           | p21 protein (Cdc42/Rac)-activated kinase 2                           |                             |
| 1.06                                | PARVA          | parvin, alpha                                                        |                             |
| 0.93                                | PTEN           | phosphatase and tensin homolog                                       |                             |
| 0.91                                | PIK3CA         | phosphoinositide-3-kinase, catalytic, alpha polypeptide              |                             |
| 1.11                                | PIK3CB         | phosphoinositide-3-kinase, catalytic, beta polypeptide               |                             |
| 1.08                                | PIK3CD         | phosphoinositide-3-kinase, catalytic, delta polypeptide              |                             |
| 0.96                                | PIK3CG         | phosphoinositide-3-kinase, catalytic, gamma polypeptide              |                             |
| 1.07                                | PIK3C2A        | phosphoinositide-3-kinase, class 2, alpha polypeptide                |                             |
| 0.95                                | PIK3C2B        | phosphoinositide-3-kinase, class 2, beta polypeptide                 |                             |
| 0.97                                | PIK3C2G        | phosphoinositide-3-kinase, class 2, gamma polypeptide                |                             |
| 0.91                                | PLA2G1B        | phospholipase A2, group IB                                           |                             |
| 1.07                                | PLA2G2A        | phospholipase A2, group IIA                                          |                             |
| 0.90                                | PLA2G4A        | phospholipase A2, group IVA                                          |                             |
| 1.04                                | PLA2G7         | phospholipase A2, group VII                                          |                             |
| 0.93                                | PLCG1          | phospholipase C, gamma 1                                             |                             |
| 1.14                                | PLCG2          | phospholipase C, gamma 2                                             |                             |
| 1.06                                | PLD1           | phospholipase D1, phosphatidylcholine-specific                       |                             |
| 0.90                                | PLAU           | plasminogen activator, urokinase                                     |                             |
| 0.91                                | PLAUR          | plasminogen activator, urokinase receptor                            |                             |
| 1.04                                | PF4            | platelet factor 4                                                    |                             |
| 1.06                                | PTAFR          | platelet-activating factor receptor                                  |                             |
| 1.16                                | PDGFA          | platelet-derived growth factor alpha polypeptide                     |                             |
| 0.93                                | PDGFB          | platelet-derived growth factor beta polypeptide                      |                             |
| 1.15                                | PDGFRA         | platelet-derived growth factor receptor, alpha polypeptide           |                             |
| 0.90                                | PDGFRB         | platelet-derived growth factor receptor, beta polypeptide            |                             |
| 1.03                                | PLXNB1         | plexin B1                                                            |                             |
| 1.04                                | PLXNC1         | plexin C1                                                            |                             |
| 1.04                                | PLXND1         | plexin D1                                                            |                             |
| 0.98                                | PROKR1         | prokineticin receptor 1                                              |                             |
| 1.01                                | PPBP           | pro-platelet basic protein                                           |                             |
| 1.12                                | PRKCA          | protein kinase C, alpha                                              |                             |
| 0.97                                | PRKCB          | protein kinase C, beta                                               |                             |
| 0.93                                | PRKCD          | protein kinase C, delta                                              |                             |
| 0.88                                | PRKCE          | protein kinase C, epsilon                                            |                             |
| 0.93                                | PRKCH          | protein kinase C, eta                                                |                             |
| 0.95                                | PRKCG          | protein kinase C, gamma                                              |                             |
| 1.06                                | PRKCI          | protein kinase C, iota                                               |                             |
| 1.06                                | PRKCQ          | protein kinase C, theta                                              |                             |
| 0.98                                | PRKCZ          | protein kinase C, zeta                                               |                             |
| 0.92                                | PRKD1          | protein kinase D1                                                    |                             |
| 1.04                                | PRKD2          | protein kinase D2                                                    |                             |
| 0.92                                | PRKD3          | protein kinase D3                                                    |                             |
| 0.97                                | PTPN11         | protein tyrosine phosphatase, non-receptor type 11                   |                             |
| Not Detected                        | PTPRC          | protein tyrosine phosphatase, receptor type, C                       |                             |
| 0.92                                | PTPRJ          | protein tyrosine phosphatase, receptor type, J                       |                             |
| 0.91                                | PTPRM          | protein tyrosine phosphatase, receptor type, M                       |                             |
| 0.86                                | PTK2           | PTK2 protein tyrosine kinase 2                                       |                             |
| 0.90                                | RDX            | radixin                                                              |                             |
| 0.95                                | RHOA           | ras homolog gene family, member A                                    |                             |
| 0.96                                | RHOB           | ras homolog gene family, member B                                    |                             |
| 1.03                                | RHOC           | ras homolog gene family, member C                                    |                             |
| 0.97                                | RHOG           | ras homolog gene family, member G                                    |                             |
| 0.95                                | RAC1           | ras-related C3 botulinum toxin substrate 1                           |                             |
| 1.06                                | RAC2           | ras-related C3 botulinum toxin substrate 2                           |                             |
| 1.09                                | RRAS           | related RAS viral (r-ras) oncogene homolog                           |                             |
| 0.90                                | ARHGAP35       | Rho GTPase activating protein 35                                     |                             |
| 1.04                                | ROCK1          | Rho-associated, coiled-coil containing protein kinase 1              |                             |
| 1.09                                | ROCK2          | Rho-associated, coiled-coil containing protein kinase 2              |                             |
| Not Detected                        | RNASE2         | ribonuclease, RNase A family, 2                                      |                             |
| 0.87                                | RPS6KA1        | ribosomal protein S6 kinase, 90kDa, polypeptide 1                    |                             |
| 1.05                                | RPS6KA3        | ribosomal protein S6 kinase, 90kDa, polypeptide 3                    |                             |
| 0.91                                | RPS6KA5        | ribosomal protein S6 kinase, 90kDa, polypeptide 5                    |                             |
| 1.07                                | ROBO1          | roundabout, axon guidance receptor, homolog 1                        |                             |
| <b>12.47</b>                        | <b>S100A12</b> | <b>S100 calcium binding protein A12</b>                              | <b>Reached significance</b> |
| 1.08                                | S100A8         | S100 calcium binding protein A8                                      |                             |
| 0.98                                | S100A9         | S100 calcium binding protein A9                                      |                             |
| 1.01                                | SPP1           | secreted phosphoprotein 1                                            |                             |
| 1.04                                | SCG2           | secretogranin II                                                     |                             |
| 1.03                                | SELL           | selectin L                                                           |                             |
| 1.03                                | SEMA3A         | semaphorin 3A                                                        |                             |
| 0.94                                | SEMA4D         | semaphorin 4D                                                        |                             |



| Relative Fold Expression Difference | Gene Symbol | Gene Name                                                                       | Notes |
|-------------------------------------|-------------|---------------------------------------------------------------------------------|-------|
| 1.04                                | SEMA7A      | semaphorin 7A, GPI membrane anchor                                              |       |
| Not Detected                        | SAA1        | serum amyloid A1                                                                |       |
| 0.95                                | SPN         | sialophorin                                                                     |       |
| 1.11                                | SLIT2       | slit homolog 2                                                                  |       |
| 0.93                                | SMAD4       | SMAD family member 4                                                            |       |
| 1.08                                | SOS1        | son of sevenless homolog 1                                                      |       |
| 1.07                                | SHH         | sonic hedgehog                                                                  |       |
| 1.21                                | SYK         | spleen tyrosine kinase                                                          |       |
| 0.87                                | SFN         | stratifin                                                                       |       |
| 1.06                                | SFTPD       | surfactant protein D                                                            |       |
| 0.84                                | SMARCA4     | SWI/SNF related, matrix associated, actin dependent regulator of chromatin a4   |       |
| 1.12                                | SDCBP       | syndecan binding protein                                                        |       |
| 1.27                                | TACR1       | tachykinin receptor 1                                                           |       |
| 1.05                                | TLN1        | taln 1                                                                          |       |
| 1.03                                | TBP         | TATA box binding protein                                                        |       |
| 0.96                                | TYMP        | thymidine phosphorylase                                                         |       |
| 1.11                                | TLR2        | toll-like receptor 2                                                            |       |
| 0.92                                | TLR4        | toll-like receptor 4                                                            |       |
| 1.09                                | TGFB1       | transforming growth factor, beta 1                                              |       |
| 0.95                                | TGFB2       | transforming growth factor, beta 2                                              |       |
| 0.95                                | TGFB3       | transforming growth factor, beta 3                                              |       |
| 1.07                                | TRPC6       | transient receptor potential cation channel, subfamily C, member 6              |       |
| 1.01                                | TREM2       | triggering receptor expressed on myeloid cells 2                                |       |
| 1.12                                | TRIO        | triple functional domain (PTPRF interacting)                                    |       |
| 1.02                                | TSC2        | tuberous sclerosis 2                                                            |       |
| 1.04                                | TNF         | tumor necrosis factor                                                           |       |
| 1.03                                | TNFSF11     | tumor necrosis factor (ligand) superfamily, member 11                           |       |
| 1.07                                | TNFRSF11A   | tumor necrosis factor receptor superfamily, member 11a, NFKB activator          |       |
| 0.88                                | TNFRSF1A    | tumor necrosis factor receptor superfamily, member 1A                           |       |
| 1.04                                | TYROBP      | TYRO protein tyrosine kinase binding protein                                    |       |
| 1.08                                | YWHAB       | tyrosine 3-monooxygenase/tryptophan 5-monooxygenase activation protein, beta    |       |
| 0.99                                | YWHAE       | tyrosine 3-monooxygenase/tryptophan 5-monooxygenase activation protein, epsilon |       |
| 0.75                                | YWHAH       | tyrosine 3-monooxygenase/tryptophan 5-monooxygenase activation protein, eta     |       |
| 0.91                                | YWHAQ       | tyrosine 3-monooxygenase/tryptophan 5-monooxygenase activation protein, theta   |       |
| 1.10                                | YWHAZ       | tyrosine 3-monooxygenase/tryptophan 5-monooxygenase activation protein, zeta    |       |
| 0.86                                | UNC5B       | unc-5 homolog B                                                                 |       |
| 0.91                                | ABL2        | v-abl Abelson murine leukemia viral oncogene homolog 2                          |       |
| 1.07                                | AKT1        | v-akt murine thymoma viral oncogene homolog 1                                   |       |
| 1.06                                | VEGFA       | vascular endothelial growth factor A                                            |       |
| 1.02                                | VEGFB       | vascular endothelial growth factor B                                            |       |
| 1.03                                | VEGFC       | vascular endothelial growth factor C                                            |       |
| 0.96                                | VASP        | vasodilator-stimulated phosphoprotein                                           |       |
| 1.18                                | VAV2        | vav 2 guanine nucleotide exchange factor                                        |       |
| 0.96                                | ERBB2       | v-erb-b2 erythroblastic leukemia viral oncogene homolog 2                       |       |
| 0.98                                | HRAS        | v-Ha-ras Harvey rat sarcoma viral oncogene homolog                              |       |
| 0.93                                | KRAS        | v-Ki-ras2 Kirsten rat sarcoma viral oncogene homolog                            |       |
| 1.07                                | KIT         | v-kit Hardy-Zuckerman 4 feline sarcoma viral oncogene homolog                   |       |
| 0.84                                | RAF1        | v-raf-1 murine leukemia viral oncogene homolog 1                                |       |
| 1.15                                | RALA        | v-ral simian leukemia viral oncogene homolog A                                  |       |
| 1.18                                | SRC         | v-src sarcoma (Schmidt-Ruppin A-2) viral oncogene homolog                       |       |
| 1.07                                | WNT2        | wingless-type MMTV integration site family member 2                             |       |
| 1.05                                | WNT1        | wingless-type MMTV integration site family, member 1                            |       |
| 1.04                                | WNT11       | wingless-type MMTV integration site family, member 11                           |       |
| 1.05                                | WNT3A       | wingless-type MMTV integration site family, member 3A                           |       |
| 0.90                                | WNT5A       | wingless-type MMTV integration site family, member 5A                           |       |
